# Supplementary material
Source: Springer Nature journal article supplement (https://www.springermedizin.de/resource/supplementary/12955_2011_934_MOESM2_ESM.pdf/9558722)

# Vignette

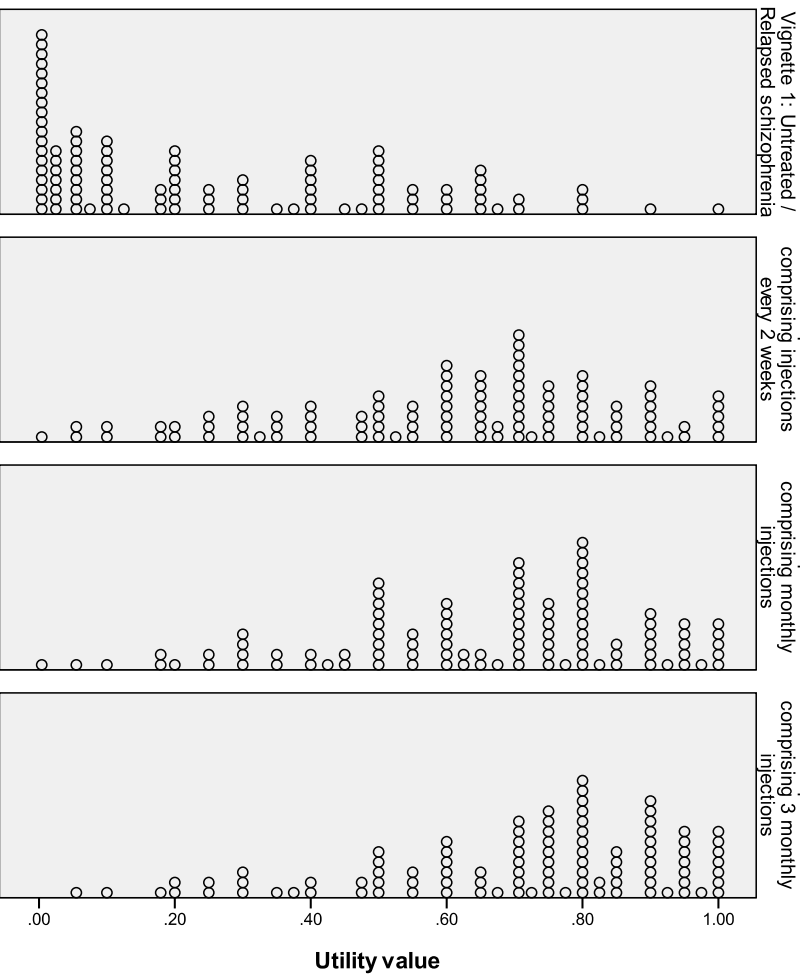

Supplement: MOESM2 [file 9558722]
